# Supplementary material
Source: MDPI journal article supplement (https://www.mdpi.com/2073-4441/12/3/888)
Supplement: s1 [file s1]

**Table S1:** Distribution of biological contaminants detected across roadside spring and home tap water samples featuring highest concentration and number of samples exceeding Safe Drinking Water Act (SDWA) Maximum Contaminant Levels (MCLs).

| Biological Contaminant                  | Paired Springs |              |            |                 |              |              | Home Sample Locations |                  |                     |                   |
|-----------------------------------------|----------------|--------------|------------|-----------------|--------------|--------------|-----------------------|------------------|---------------------|-------------------|
|                                         | #1             | #2           | #3         | #4              | #5           | #6           | Floyd County, VA      | Craig County, VA | McDowell County, WV | Martin County, KY |
| <i>Total coliform</i><br>(0 MPN/100 mL) | 194<br>(1/1)   | 816<br>(1/1) | 4<br>(1/1) | >2,420<br>(1/1) | 579<br>(2/2) | 214<br>(1/1) | 3<br>(1/1)            | 111<br>(1/1)     | >2,420<br>(8/10)    | 1<br>(1/9)        |
| <i>E. coli</i><br>(0 MPN/100 mL)        | 0              | 3<br>(1/1)   | 0          | 488<br>(1/1)    | 4<br>(2/2)   | 0            | 0                     | 0                | 461<br>(3/10)       | 0                 |
