# Supplementary material
Source: MDPI journal article supplement (https://www.mdpi.com/2073-4441/12/3/888)
Supplement: s1 [file s1]

**Table S2:** Distribution of inorganic ion contaminants detected across roadside spring and home tap water samples featuring highest concentration. Constituents with concentrations that exceeded SDWA recommendations are bolded and include the ratio of samples exceeding SDWA recommendations. (MCL = Maximum Contaminant Level, TT = Treatment Technique, SMCL = Secondary Maximum Contaminant Level, HRL = Health Reference Level, GL = Guidance Level, BD = below detection limit).

| Inorganic Ion Contaminants |                                                | Paired Springs (Maximum Value) |                    |         |                    |                    |                    | Home Sample Locations |                    |                         |                       |
|----------------------------|------------------------------------------------|--------------------------------|--------------------|---------|--------------------|--------------------|--------------------|-----------------------|--------------------|-------------------------|-----------------------|
|                            |                                                | #1                             | #2                 | #3      | #4                 | #5                 | #6                 | Floyd County, VA      | Craig County, VA   | McDowell County, WV     | Martin County, KY     |
| MCL                        | <i>As</i> (> 10 ppb)                           | BD                             | 0.19               | 0.05    | 0.23               | 0.07               | BD                 | 7.27                  | 0.08               | 5.97                    | 0.24                  |
|                            | <i>Ba</i> (> 2,000 ppb)                        | 34.0                           | 14.7               | 49.9    | 25.5               | 64.6               | 31.8               | 44.7                  | 42.3               | <b>12,399.0 (2/10)</b>  | 19.9                  |
|                            | <i>Cd</i> (> 5 ppb)                            | 0.03                           | 0.01               | 0.02    | 0.01               | 0.00               | 0.01               | 0.02                  | 0.03               | 0.42                    | 0.03                  |
|                            | <i>Cr</i> (> 100 ppb)                          | 0.26                           | 0.44               | 0.10    | 0.26               | 0.59               | 0.25               | 0.52                  | 0.38               | 1.00                    | 0.52                  |
|                            | <i>F</i> (> 4 ppm)                             | 0.08                           | 0.03               | 0.06    | 0.04               | 0.10               | 0.06               | 0.08                  | 0.02               | 0.64                    | 0.82                  |
|                            | <i>NO<sup>3</sup>-N</i> (> 10 ppm)             | 0.28                           | 0.31               | 0.10    | 0.23               | 0.16               | 0.09               | 0.44                  | 0.26               | 1.11                    | 0.18                  |
|                            | <i>Se</i> (> 50 ppb)                           | 0.12                           | 0.31               | 2.60    | 0.41               | BD                 | 0.21               | 0.47                  | BD                 | 3.93                    | 1.47                  |
|                            | <i>U</i> (> 30 ppb)                            | 0.00                           | 0.06               | 0.13    | 0.02               | 0.03               | 0.02               | 6.28                  | 0.04               | 0.05                    | 0.05                  |
| TT                         | <i>Cu</i> (> 1,300 ppb)                        | 0.88                           | 0.24               | 0.34    | 0.46               | 2.09               | 0.51               | 227.6                 | 0.51               | 332.0                   | 177.4                 |
|                            | <i>Pb</i> (> 15 ppb)                           | 0.02                           | 0.21               | BD      | 0.34               | 0.23               | 0.08               | 0.35                  | 0.47               | 2.42                    | 3.24                  |
| SMCL                       | <i>Ag</i> (> 100 ppb)                          | 0.0                            | 0.11               | 0.00    | 0.01               | 0.02               | 0.01               | 6.04                  | 0.05               | 0.03                    | 0.29                  |
|                            | <i>Al</i> (> 50 – 200 ppb)                     | 22.9                           | <b>211.3 (1/1)</b> | BD      | <b>119.7 (1/1)</b> | <b>477.8 (2/2)</b> | <b>164.4 (1/1)</b> | 3.66                  | <b>244.0 (1/1)</b> | <b>704.6 (3/10)</b>     | <b>5,404.1 (8/12)</b> |
|                            | <i>Fe</i> (> 300 ppb)                          | 27.0                           | 127.5              | 1.70    | 223.0              | 221.5              | 72.2               | 111.2                 | 48.9               | <b>34,776.0 (6/10)</b>  | 96.7                  |
|                            | <i>Mn</i> (> 50 ppb)                           | 1.06                           | 7.21               | 0.03    | 18.9               | 3.40               | 18.9               | <b>55.6 (1/1)</b>     | 17.7               | <b>1,330.4 (6/10)</b>   | 2.49                  |
|                            | <i>SO<sub>4</sub><sup>2-</sup></i> (> 250 ppm) | 0.92                           | 1.06               | 62.5    | 11.6               | 28.6               | 33.6               | 7.98                  | 3.53               | 52.2                    | 10.7                  |
|                            | <i>Zn</i> (> 5,000 ppb)                        | 9.04                           | 14.3               | 12.2    | 8.38               | 15.0               | 8.26               | 1,048.4               | 15.9               | 1,848.6                 | 266.9                 |
|                            | <i>pH</i> (6.5 – 8.5)                          | 6.59                           | 7.55               | 6.17    | 7.6                | 7.73 - 8.41        | 6.85               | 6.90                  | <b>6.15 (1/1)</b>  | 6.67 - 7.33             | 7.11 - 7.43           |
| HRL/ GL                    | <i>Na</i> (> 20,000 ppb)                       | 5,629.7                        | 725.0              | 8,224.2 | 3,382.4            | 10,185.5           | 4,467.1            | 7,179.8               | 313.2              | <b>604,434.9 (2/10)</b> | 6,286.6               |
|                            | <i>Sr</i> (> 1,500 ppb)                        | 42.9                           | 33.5               | 954.4   | 47.5               | 315.9              | 172.7              | 43.7                  | 11.1               | <b>9,351.1 (2/10)</b>   | 41.8                  |
