# Supplementary material
Source: MDPI journal article supplement (https://www.mdpi.com/2073-4441/12/3/888)
Supplement: s1 [file s1]

**Table S3:** Results of Wilcoxon Rank Sum Test to determine statistical significance in comparison of paired home and spring water sample constituents (MCL = Maximum Contaminant Level, TT = Treatment Technique, SMCL = Secondary Maximum Contaminant Level, HRL = Health Reference Level, GL = Guidance Level)

|            | Contaminants                                    | # of Homes Exceeding Recommendations | # of Springs Exceeding Recommendations | P-Value | Spring vs Home Values     |
|------------|-------------------------------------------------|--------------------------------------|----------------------------------------|---------|---------------------------|
| MCL        | <i>Total Coliform</i> (0 MPN/100mL)             | 11/21                                | 7/7                                    | 0.02    | Spring > Home             |
|            | <i>E. coli</i> (0 MPN/100 mL)                   | 3/21                                 | 4/7                                    | 0.15    | No significant difference |
|            | <i>As</i> ( >10 ppb)                            | 0                                    | 0                                      | 1.0     | No significant difference |
|            | <i>Ba</i> ( >2,000 ppb)                         | 2/24                                 | 0                                      | 0.70    | No significant difference |
|            | <i>Cd</i> ( > 5 ppb)                            | 0                                    | 0                                      | 0.01    | Spring < Home             |
|            | <i>Cr</i> ( > 100 ppb)                          | 0                                    | 0                                      | 0.94    | No significant difference |
|            | <i>F</i> ( > 4 ppm)                             | 0                                    | 0                                      | < 0.01  | Spring < Home             |
|            | <i>NO<sub>3</sub>-</i> ( > 10 ppm)              | 0                                    | 0                                      | 0.03    | Spring < Home             |
|            | <i>Se</i> ( > 50 ppb)                           | 0                                    | 0                                      | 0.68    | No significant difference |
|            | <i>U</i> ( > 30 ppb)                            | 0                                    | 0                                      | 0.02    | Spring > Home             |
| TT         | <i>Cu</i> ( > 1,300 ppb)                        | 0                                    | 0                                      | < 0.01  | Spring < Home             |
|            | <i>Pb</i> ( > 15 ppb)                           | 0                                    | 0                                      | < 0.01  | Spring < Home             |
| SMCL       | <i>Ag</i> ( > 100 ppb)                          | 0                                    | 0                                      | < 0.01  | Spring < Home             |
|            | <i>Al</i> > (50 – 200 ppb)                      | 12/24                                | 5/7                                    | 0.02    | Spring > Home             |
|            | <i>Fe</i> ( > 300 ppb)                          | 6/24                                 | 0                                      | 0.64    | No significant difference |
|            | <i>Mn</i> ( > 50 ppb)                           | 7/24                                 | 0                                      | < 0.01  | Spring < Home             |
|            | <i>SO<sub>4</sub><sup>2-</sup></i> ( > 250 ppm) | 0                                    | 0                                      | < 0.01  | Spring > Home             |
|            | <i>Zn</i> ( > 5,000 ppb)                        | 0                                    | 0                                      | < 0.01  | Spring < Home             |
| HRL/<br>GL | <i>Na</i> ( > 20,000 ppb)                       | 2/24                                 | 0                                      | < 0.01  | Spring < Home             |
|            | <i>Sr</i> ( > 1,500 ppb)                        | 2/24                                 | 0                                      | 0.03    | Spring < Home             |
