# Supplementary material
Source: MDPI journal article supplement (https://www.mdpi.com/2073-4441/12/3/888)
Supplement: s1 [file s1]

Archive with 4 entries (4 files):
- Revised_SupplementaryMaterials_HannahPatton/SupplementaryMaterials_Figure S1.pdf
- Revised_SupplementaryMaterials_HannahPatton/SupplementaryMaterials_Table S1.pdf
- Revised_SupplementaryMaterials_HannahPatton/SupplementaryMaterials_Table S2.pdf
- Revised_SupplementaryMaterials_HannahPatton/SupplementaryMaterials_Table S3.pdf
